1 **Title: Small-scale soil microbial community heterogeneity linked to landforms on**

2 **King George Island, maritime Antarctica**

3

4 **Running title: Landform influence on microbial biogeography**

5

6 Yumin Zhang<sup>a</sup>, Lu Lu<sup>a</sup>, Xulu Chang<sup>a</sup>, Fan Jiang<sup>a</sup>, Xiangdong Gao<sup>b</sup>, Fang Peng<sup>a#</sup>

7

8 <sup>a</sup>China Center for Type Culture Collection (CCTCC), College of Life Sciences, Wuhan

9 University, Wuhan 430072, China

10 <sup>b</sup>College of Life Sciences, Wuhan University, Wuhan 430072, China

11

12 #Corresponding author. Email: pf-cctcc@whu.edu.cn; Tel: (+86) 02768752056; Fax:

13 (+86) 02768754982; Address: China Center for Type Culture Collection (CCTCC),

14 College of Life Sciences, Wuhan University, Bayi Road, Wuhan 430072, China.

15

16 **ABSTRACT**

17 We analysed soil-borne microbial (bacterial, archaeal, and fungal) communities  
18 around the Fildes Region of King George Island, maritime Antarctica, which were  
19 divided into two groups according to soil elemental compositions and environmental  
20 attributes (soil chemical parameters and vegetation conditions) located in Holocene  
21 raised beach and Tertiary volcanic stratigraphy. Prokaryotic communities of the two  
22 groups were well separated; they predominantly correlated with soil elemental  
23 compositions, and were secondly correlated with environmental attributes (e.g., soil  
24 pH, total organic carbon,  $NO_3^-$ , and vegetation coverage; Pearson test,  $r = 0.59$  vs.  
25  $0.52$ , both  $P < 0.01$ ). The relatively high abundance of P, S, Cl, and Br in Group 1 was  
26 likely due to landform uplift. Lithophile-elements (Si, Al, Ca, Sr, Ti, V, and Fe)  
27 correlated with prokaryotic communities in Group 2 may originate from weathering  
28 of Tertiary volcanic rock. The elements and nutrients accumulated during formation  
29 of different landforms influenced the development of soils, plant growth, and  
30 microbial communities, and resulted in small-scale spatially heterogeneous biological  
31 distributions. We propose that the geological evolution of the Fildes Region was  
32 crucial to its microbial community development.

33

34 **IMPORTANCE**

35 This current study analyzed soil-borne microbial communities around the Fildes  
36 Region of King George Island, maritime Antarctica, which were divided into two  
37 groups according to soil elemental compositions and environmental attributes. We

38 provide new evidence for the crucial influence of landforms on small-scale structures  
39 and spatial heterogeneity of soil microbial communities.

40

#### 41 **KEYWORDS**

42 Soil-borne microbial community, small-scale spatial heterogeneity, landform,  
43 maritime Antarctica, pyrosequencing, phospholipid fatty acid

44

#### 45 **Introduction**

46 Investigating microbial communities at different spatial scales, and the factors that  
47 affect microorganism distributions, are fundamental aspects of microbial  
48 biogeography (39, 42). In many terrestrial ecosystems, bacterial, fungal, and archaeal  
49 communities are distributed along soil parameter gradients (e.g., temperature, pH,  
50 water content, salinity, and nutrition; (35, 37, 48, 60, 71). Meanwhile, plants and  
51 animals that depend on the soil ecosystem may also have significant influences on  
52 microorganisms (22, 55, 75). It is therefore difficult to determine the most sensitive  
53 factors influencing microbial communities. Nonetheless, in most distinct terrestrial  
54 areas with special environments, distribution trends in the microbial community are  
55 dominantly shaped by environmental factors that limit or prevent cell growth (33, 39).  
56 Historical contingencies are also important for microbial community distribution on  
57 spatial scales of one to tens of thousands of kilometres, but such effects may be  
58 overwhelmed at small and intermediate scales (100m-1000km), including across  
59 Antarctica (12, 42). Therefore, microbial spatial structures can be used to partly

60 reflect the external or intrinsic drivers of microbial population development and  
61 activities (72).

62

63 The extreme conditions of Antarctica, such as low temperatures, low nutrient  
64 availability, high UV radiation, and frequent freeze-thaw (14, 65), result in relatively  
65 simple ecosystems. Hence, the relatively uncomplicated food-web structure of  
66 Antarctic terrestrial habitats provides an appropriately manageable system to  
67 investigate the drivers of soil microbial diversity and composition (70). Unsurprisingly,  
68 spatial microbial community patterns have been observed here, ranging from  
69 site-specific regions to large regional scale (11, 63, 69). However, to the best of our  
70 knowledge the effects of historical contingency on microbial community distribution  
71 at small scale spatial have not been observed yet.

72

73 In this study, we used Illumina Miseq pyrosequencing and the phospholipid fatty  
74 acids (PLFA) method to survey the diversity and structure of prokaryotic and fungal  
75 communities in 12 quadrat plots around the Fildes Region, King George Island. Fildes  
76 is one of the largest ice-free regions in maritime Antarctica, and has higher  
77 biodiversity than continental Antarctica. This typical small-scale spatial region  
78 includes two Antarctic Special Protected Areas (ASPAs), covering approximately 30  
79 km<sup>2</sup> of the Fildes Peninsula, Ardley Island, and adjacent islands (8). Nevertheless,  
80 after the last glacial maximum, this region experienced multiple geologic and glacial  
81 events, including deglaciation (8400~5500 BP), glacial re-advance (after 6000 BP),

82 Holocene glacio-isostatic and tectonic uplift during the glacial erosive phase, and  
83 glacier retraction (30, 44). Glacial activities and past sea level changes were the key  
84 drivers of landform and soil development across the Fildes region (5, 62), and their  
85 effects on terrestrial microbial communities should not be ignored (59).

86

87 The 12 permanent quadrats analysed in our study have been established since 2013.  
88 Their primary aim was to evaluate long-term ecosystem evolution according to  
89 biomass and diversity under climate change conditions, and to build a  
90 comprehensive research platform for multi-disciplinary study, including botany,  
91 microbiology, ecology, and environmental science (68). For these purposes, all  
92 selected quadrats must: (a) include Antarctic hairgrass (*Deschampsia antarctica*), the  
93 only advanced plant discovered in the Fildes region, associated with moss and lichen;  
94 (b) have stable soil and vegetation for long term monitoring; and (c) be protected  
95 from human disturbance (mostly scientific explorers) and animal activity as much as  
96 possible. Soil maturation and vegetation colonization takes a very long time under  
97 unfavourable conditions, so the established quadrats represented natural and stable  
98 habitats around the region. Recently, based on 454 pyrosequencing data, Wang et  
99 al.(61) found that the diversity and structure of soil bacterial communities in four  
100 sites of the Fildes region were significantly affected by pH, phosphate phosphorus,  
101 organic carbon, and organic nitrogen. The relationships between microbial  
102 communities, geological factors, and landform development have not been studied.  
103 In this study, we attempt to answer three questions: (i) what is the microbial

104 community structure in this small-scale region of maritime Antarctica; (ii) which  
105 factors affect the distribution of microbial communities; and (iii) do microbial  
106 communities reflect different landform development in history. In order to explore  
107 these issues, a number of soil chemical properties and vegetation attributes were  
108 measured, representing conventional environmental factors; the soil element  
109 composition was determined by X-ray fluorescence spectrometer, which is an  
110 acceptable proxy for soil or sediment erosion and development in different  
111 landforms (4, 28, 66) , and combining geological literature related to the Fildes region  
112 to represent landform types. We aim to improve understanding of terrestrial  
113 microbial communities in maritime Antarctic ice-free areas, and contribute to a new  
114 perspective on small-scale microbial biogeography.

115

## 116 **Results**

### 117 *Soil elemental compositions and environmental attributes of quadrats*

118 A total of 20 elements in the sample soils were detected by X-Ray fluorescence  
119 spectrometer, and 11 environmental attributes were measured (Table S1). Principle  
120 component analysis with normalized whole soil elemental compositions and  
121 environmental attribute data showed that 36 samples were well separated by the  
122 original point of the PC1 coordinate axis (Fig.1a). Hence the quadrat plots could be  
123 divided into two groups reflecting different soil types and environmental conditions,  
124 in which Group 1 included quadrat plots Q2, Q3, Q6, and Q7, and Group 2 included  
125 all other quadrat plots (Q1, Q4, Q5, Q9, Q10, Q11, Q12, and Q13). The heatmap

126 cluster analysis supported the grouping suggested by whole element and  
127 environmental data (Fig. 1b).

128

129 The soil element profile revealed that lithophile elements (Si, Al, Ca, Mg, Fe)  
130 occupied the major portions. Twelve elements (Al, Ca, Cu, Fe, K, Mg, Mn, Si, Sr, Ti, V,  
131 and Zn) were more abundant in Group 2, and four elements (P, S, Cl, and Br) were  
132 significantly more abundant in Group 1 (Wilcoxon test,  $P < 0.05$ , Table S1).  
133 PERMANOVA analysis revealed a highly significant difference in soil element  
134 composition between the two sample groups ( $Pseudo-F = 17.74$ ,  $P < 0.01$ ). Pairwise  
135 correlative comparisons between elements demonstrated that P, S, Cl, and Br were  
136 positively correlated with each other, and negatively correlated with Mg, Al, Si, Ca,  
137 Mn, Zn, Sr, V, Fe and Ti, which also had positive correlations with each other (Fig. S1).  
138 A significant difference was also observed in the environmental attributes between  
139 Group 1 and Group 2 (PERMANOVA test,  $Pseudo-F = 15.17$ ,  $P < 0.01$ ), consisting of  
140 lower soil pH and higher total organic carbon (TOC,  $NH_4^+$ ,  $NO_3^-$ ) and moisture  
141 contents in Group 1. In addition, vegetation properties such as hairgrass coverage  
142 (DAC) and total vegetation coverage (VC) were also higher in Group 1 plots (Wilcoxon  
143 test,  $P < 0.05$ , Table S1).

144

#### 145 *Diversity and composition of microbial communities in quadrats*

146 After sequence-quality filtering, we obtained a total of 2,389,662 high-quality  
147 bacterial 16S rRNA gene reads, 1,423,619 archaea 16S rRNA gene reads, and

148 1,953,908 ITS reads. These reads constituted 98,887, 49,000, and 8,464 operational  
149 taxonomic units (OTUs) at a 0.03 discrepancy (97% identity) for bacterial, archaeal,  
150 and fungal taxa, respectively. The OTUs diversities of Shannon, Chao 1, and ACE index  
151 of bacteria, archaea, and fungi did not differ between Group 1 and Group 2  
152 (Wilcoxon test,  $P > 0.05$ , Table S2). For bacteria, 20 phyla and some unidentified  
153 bacteria (0~0.8%) were detected, and the OTU sequences of most quadrat soils were  
154 dominated by *Actinobacteria* (24.2%), *Acidobacteria* (14.7%), *Proteobacteria* (15.1%),  
155 *Chloroflexi* (12.3%), and *Gemmatimonadetes* (7.2%) (Fig. S2). For archaea, a  
156 number of OTU sequences (74.6%, maximum) were not assigned to any taxon; the  
157 remainder was dominated by *Crenarchaeota* (94.5%) and *Euryarchaeota* (5.5%), and  
158 the dominant classes of the phyla were *Thaumarchaeota* and *Thermoplasmata*,  
159 respectively. For fungi, six phyla were detected, and all quadrat plot soils were  
160 dominated by *Ascomycota* (69.1%), *Basidiomycota* (17.6%), and *Zygomycota* (4.5%).  
161 The percentage of unassigned OTUs and unidentified fungi were 6.8%–64.3% and  
162 0.4%–7.7%, respectively. PERMANOVA tests of Bray-Curtis distances revealed  
163 significant differences between the two groups for prokaryotic 16S rRNA genes  
164 (integrated data normalized by the bacterial and archaeal OTU data set, Pseudo- $F =$   
165 3.1,  $P = 0.0002$ ), but not for fungal ITS genes (Pseudo- $F = 1.3$ ,  $P = 0.196$ ). This was  
166 consistent with the grouping result of nonmetric multidimensional scaling (NMDS)  
167 analysis with the bacterial and archaeal OTU dataset (Fig. 2).

168

169 *Links among microbial composition, soil elemental composition, and environmental*



170 *attributes*

171 The prokaryotic OTU composition showed a strong and significant correlation with  
172 soil elements ( $r = 0.59$ ,  $P < 0.01$ , Pearson test), and a less but still significant  
173 correlation with environmental attributes ( $r = 0.52$ ,  $P < 0.01$ , Pearson test; Fig. 3a).  
174 Fungal community composition did not show strong correlations with either soil  
175 elements or environmental attributes ( $P > 0.05$ ; Fig. 3b). The soil elements and  
176 environmental attributes in canonical correspondence analysis (CCA) were selected  
177 by variation inflation test (see the Methods for details). CCA results for bacterial and  
178 archaeal community composition and soil elements, with significant models at the  
179 confidence level (both  $P < 0.01$ ), indicated that the 11 soil elements are important  
180 factors controlling bacterial and archaeal community structures, and explain 60.0%  
181 and 47.3% of their variations, respectively (Fig. 4a and b).

182

183 Among these elements, P and Br were important elements controlling microbial  
184 community structures in Group 1, and other lithophile and metal elements  
185 controlled Group 2. The importance of these soil elements was verified by a Monte  
186 Carlo test ( $P < 0.05$ , 999 permutations) with prokaryotic community data comprising  
187 bacterial and archaeal community compositions (Table 1). For fungal communities,  
188 CCA analysis showed that the two groups were not well separated from the others,  
189 and the model was not significant within the confidence level ( $P > 0.05$ ). Only 37.3%  
190 of fungal community variations could be explained by the 11 soil elements (Fig. 4c).  
191 Considering the relationships between microbial communities and environmental

192 attributes, the same analysis was made by CCA (Fig. 4d, e, and f). The models were  
193 significant between both bacterial ( $P < 0.01$ , 56.2% explained) and archaeal ( $P < 0.05$ ,  
194 43.6% explained) community structures and environmental attributes. The Monte  
195 Carlo test (999) revealed that total organic C (TOC), soil pH, moisture, site altitude,  
196 hairgrass coverage (DAC), and total vegetation coverage (VC) showed strong effects  
197 on prokaryotic communities. For fungal communities, the model was not significant  
198 within the confidence level ( $P > 0.05$ , 34.3% explained); however, soil pH, site  
199 altitude, moss species amount (MS), and lichen species amount (LS) were the  
200 environmental attributes affecting fungal community composition (Monte Carlo test,  
201  $P < 0.05$ , 999 permutations; Table 1). For the mantel test of microbial community  
202 structures, including all factors investigated in this study, see Table S3.

203

204 *Microbial biomass and microbial diversity determined by the phospholipid fatty acids*  
205 *(PLFA) method*

206 The total amounts of PLFA (totPLFA) of Group 1 were significantly higher than those  
207 of Group 2 (Wilcoxon test,  $P < 0.05$ ; Fig. S3). CCA analysis of the individual relative  
208 concentration (mol%) of the 45 most common PLFAs showed that, on the whole, the  
209 11 soil elements and the 11 environmental attributes were all important factors  
210 controlling soil PLFA patterns (Fig. S4,  $P < 0.01$ ), with 47.5% and 47.0% of the  
211 variations explained, respectively. Among these factors, each of the 11 elements, and  
212 pH, moisture, total organic C (TOC), *Deschampsia antarctica* coverage (DOC), and  
213 total vegetation coverage (VC) of the environmental attributes had significant effects

214 on soil PLFA composition (Table 1). Microorganism categories including bacteria,  
215 fungi and protozoa were classified by indicator PLFAs according to microbial  
216 identification systems (MIDI). The relative abundance of AM fungi, actinomycetes,  
217 and anaerobes were higher in Group 1, and Gram-negative bacteria was higher in  
218 Group 2 (Fig. S5; Welch's t-test, two-sided,  $P < 0.05$ ).

219

#### 220 *Differences of microbial community composition between the two groups*

221 In our analysis, the classified mode of the Random forests machine learning  
222 technique (9, 16) could be accepted if the ratio of the baseline error to the observed  
223 error was greater than 2, and we considered an OTU to be highly predictive if its  
224 importance score was at least 0.001. For bacteria, random forest analysis revealed  
225 that 58 OTUs distinguished the two groups, *Acidobacteria* were overrepresented in  
226 Group 1, and the OTUs assigned to the *Thermoleophilia* class of the phylum  
227 *Actinobacteria*, and genus *Geobacillus* of phylum *Firmicutes*, were overrepresented  
228 in Group 2. For archaea, 38 OTUs distinguished the two groups, except for 12 OTUs  
229 with no assigned taxa. Some 11 OTUs were overrepresented in Group 1 and 17 OTUs  
230 were overrepresented in Group 2; all were assigned to genus *Candidatus*  
231 *Nitrososphaera* of phylum *Crenarchaeota*. As the ratio of the baseline error to the  
232 observed error of the random forest analysis with fungal OTUs was less than 2, we  
233 considered that the non-obvious classified result suggested that there was no  
234 credible difference in fungal community composition between the two groups (Table  
235 S4).

236

237 **Discussion**

238 The prokaryotic community composition of the quadrats can be divided into two  
239 groups that correlate with soil element compositions and environmental attributes.  
240 Interestingly, a published geologic map of the Fildes region and previously reported  
241 literature (38, 44) showed that the quadrats in Group 2 were located in Tertiary  
242 volcanic stratigraphy, and those in Group 1 were found on a Holocene raised beach  
243 (Fig. 5). We suggest that there is a potential relationship between microbial  
244 communities and the development of landforms at this small spatial scale.

245

246 In this area, a series of geological events, including volcanic activity, glacial erosion  
247 and retraction, isostatic uplift, and sea level change, created rich landform types.  
248 According to geomorphological and sedimentary evidence, relative sea level (RSL)  
249 gradually fell to < 14.5 m between 7000 and 4750 cal a BP as a consequence of  
250 isostatic uplift in response to regional deglaciation (30, 62). During landform  
251 formation, rich marine elements and nutrients were transferred to the land (5, 44).  
252 Moreover, from approximately 2500 years ago, mammals, especially penguins, began  
253 to colonize the newly uplifted beaches until at least ~500 years ago when the raised  
254 beaches were abandoned (according to chronological research of abandoned  
255 rookeries on King George Island (54)). These abandoned penguin rookeries are  
256 indicators of Holocene paleoclimate and also accumulated rich nutrients during the  
257 period (3). These input elements, nutrients, and marine microorganisms clearly

258 promoted the development of soil and plant growth, and influenced patterns of  
259 microbial community formation.

260

261 Soil elemental profiles can be seen as proxy indicators of soil types and landforms  
262 with strong soil-landform relationships (20, 34). In previous studies, soil compositions  
263 tested by X-ray fluorescence spectrometer have been revealed to be the key factors  
264 for the distribution of bacterial and fungal communities in some field sites,  
265 sediments, glacier forefields, and deserts (27, 29, 43, 52). In this study, the CCA  
266 analysis and similarity test showed that both environmental attributes and soil  
267 element compositions could influence the microbial structure and biomass. However,  
268 compared with environmental attributes, the relationship between soil element  
269 composition and prokaryotic community was stronger (Fig 4; Fig 5). Mantel analysis  
270 revealed that the relative abundance of almost every element was important for  
271 shaping prokaryotic compositions (Table S3). The quadrat plots located on the  
272 Holocene raised beach landform showed relatively high abundances of P, S, Cl, and Br,  
273 which were more correlated to marine environments and organisms. These elements  
274 are readily absorbed by vegetation and microorganisms, and presumably resulted in  
275 the development of microbial community structures in Group 1 (CCA analysis; Fig. 4).  
276 The accumulation of elements P and S may represent marine input but also mammal  
277 and bird excrement that accumulated in these raised beaches during the early stage  
278 of uplifted landform formation (54). Meanwhile, the halogen elements Cl and Br in  
279 island coastal soil likely derived mostly from seawater (49).

280

281 Conversely, the bacterial and archaeal community compositions of Group 2 were  
282 more correlated with lithophile-elements (Si, Al, Ca, Sr, Ti, V, and Fe, CCA analysis),  
283 and the landforms were almost completely isolated from the external environment  
284 until the icecap retreated ~11000–7500 cal a BP (62). This suggests that soil in  
285 quadrats located in tertiary volcanic stratigraphy mainly developed from the  
286 chemical and biological weathering of volcanic rock generated by Tertiary volcanism,  
287 and underwent paraglacial and periglacial processes. That may explain the lower soil  
288 biomass, nutrition, and vegetation coverage, as compared with Group 1; the limited  
289 nutrient input distinguished the prokaryote community composition from that of the  
290 nutrient-rich soil of Group 1. Therefore, we believe that the element composition of  
291 the soil associated with these landforms reveals geological background and historic  
292 effects.

293

294 In Group 1, the soil contained high contents of TOC,  $NH_4^+$ ,  $NO_3^-$ , and vegetation  
295 coverage, which also correlates with prokaryotic community. The relatively low pH  
296 values (Table S1) may be a result of higher vegetation coverage with more humus and  
297 fulvic acids produced by moss and lichen (21). As the rich nutrients and elements  
298 transferred from Holocene raised beach marine environments could promote soil  
299 development and plant growth, these environmental attributes seem to be a  
300 secondary factor affecting the prokaryotic community when compared to soil  
301 element compositions. Unlike Group 1, very small amounts of nutrients in the soil

302 samples of Group 2 were more likely caused by current precipitation, snowfall, and  
303 animal activity. In keeping with reported studies (19, 23, 35), pH is one of the most  
304 influential factors affecting the distribution of microbial communities in this study.

305

306 Interestingly, both prokaryotes and fungi communities were significantly correlated  
307 to the altitude of the sample location. Despite the slightly different altitudes (ranging  
308 from 11–56 m), they do not lead to significant changes in temperature, oxygen  
309 content, etc., which seems to suggest that geological uplift had an impact on  
310 microbial communities. In addition, moss and lichen species were significantly  
311 associated with fungal communities. It was previously reported that some fungal  
312 species coexist with moss and lichen in Antarctica (36, 58). We also noted that the  
313 soil element compositions and environmental attributes of ancient landforms  
314 investigated in our study were relatively stable, while those of younger landforms  
315 were more volatile (from Euclidean distances computed between samples from the  
316 PCA analysis in Fig 1a, Table S5). This suggests that the quadrat plots of Group 1 may  
317 be in an unstable new geological layer within a transboundary ecological stage from  
318 ocean to land, and disturbance from the new terrestrial environment may increase  
319 the heterogeneity of the geomorphic ecology.

320

321 As the quadrats in our study all had hairgrass growth, vegetation may be one of the  
322 main causes of this difference. Thus, our results were similar to bacterial community  
323 compositions in other vegetated parts of Antarctica (36, 58), with relatively high

324 abundances of *Chloroflexi* and *Gemmatimonadetes*, which have strong reported  
325 relationships with plants (2, 10, 17). Previous studies of Antarctic archaeal  
326 communities were mostly concentrated in marine and lake environments (13, 18, 31,  
327 32, 45), and in this study, only two archaeal phyla (*Crenarchaeota* and *Euryarchaeota*)  
328 were detected, with *Crenarchaeota* representing the overwhelming majority (> 90%)  
329 of archaeal communities. This was consistent with other terrestrial archaeal  
330 structures of Antarctica derived using other investigated methods (e.g., clone  
331 libraries of rRNA genes and microarray (1, 70).

332

333 Random forest analysis revealed that OTUs belonging to *Alphaproteobacteria*,  
334 *Acidobacteria*, and *Bacteroidetes* were mostly overrepresented in Group 1. These  
335 phyla have shown positive correlations with vegetation and the rhizosphere in  
336 farmland, arctic glacier moraines, and the Brazilian Antarctic Station (41, 55, 57). The  
337 results of our study showed different patterns at the family level, with  
338 *Acidobacteriaceae*, *Koribacteraceae*, *Chitinophagaceae*, and *Rhodospirillaceae* the  
339 most overrepresented families in Group 1. The family level differences from our  
340 study could be due to the locations of sampling points and the diverse sequencing  
341 methods. Conversely, in Group 2, the major overrepresented OTUs were class  
342 *Thermoleophilia* of phylum *Actinobacteria*. *Thermoleophilia* is a newly proposed class  
343 of phylum *Actinobacteria* that was created from the splitting of *Rubrobacteridae* (40),  
344 and its ecological position is not well understood. However, *Thermoleophilia* is  
345 abundant in deserts and glacier forelands (15, 74), and some isolated parts could be



346 cultured in low nutritional media during long incubation periods. Thus, it is  
347 reasonable that this class is found in the quadrats located in volcanic stratigraphy  
348 with high proportions of lithospheric elements and low nutrition conditions. In  
349 addition, we also found that five OTU sequences affiliated to *Flavobacteriaceae*  
350 extracted from Group 1 were clustered in marine clades, and no marine clade OTUs  
351 of *Flavobacteriaceae* were found in Group 2 (Fig. S6). Members of the family  
352 *Flavobacteriaceae* are among the most abundant picoplankton in coastal and polar  
353 oceans, and a number of genera have potential evolutionary sources from the ocean  
354 (7). Regarding genus *Candidatus Nitrososphaera*, the vital ammonia-oxidizing  
355 archaea (51, 53) was the overrepresented archaeal OTU in both groups. The  
356 uncultivable species *s\_Ca. N. SCA1170* was a major genus in Group 2 but did not  
357 appear in Group 1. This, along with evidence from NMDS analysis, implies that the  
358 two different landforms have diverse archaeal communities. Those suggested that  
359 spatial constraints for microorganisms also occur at small spatial scales.

360

361 The importance of geological factors, such as the landform and lithology, on  
362 microbial structure is less well understood (59). Locations with distinct geologic  
363 factors generally exhibit geographical isolation; hence, they are mostly distributed at  
364 large and global scales. Limited research has shown that different landforms and soil  
365 profiles are also important drivers of bacterial diversity at the regional scale (>1000  
366 km distance), and their impacts are more significant than contemporary  
367 environmental factors (25, 47). Interestingly, we found that, on such a small spatial

368 scale, prokaryotic communities also showed a landform-governed distribution trend,  
369 and the microbial community structure is expected to be an indicator of the  
370 formation of the landform. The role of geological evolution in microbial distribution  
371 can be highlighted in this study because: (i) a clear effect of the geological evolution  
372 of the Fildes region in maritime Antarctica. Glacial activity, sea level changes, and  
373 tectonic uplift due to climate change after LGM have all resulted in landform  
374 heterogeneity at a small spatial scale; (ii) seasonal freezing-thawing cycles in the area  
375 have enhanced soil development, and promoted soil particle and nutrition migration  
376 to upper and surface soil layers; and (iii) the low activity of microorganisms under the  
377 cold climate, and less human disturbance where the quadrats were established,  
378 maintained relatively stable microbial community diversity for a long time after the  
379 geological changes. However, in contrast to other research, we did not attempt to  
380 classify the common environmental factors measured in this study as ‘contemporary  
381 environmental’ factors because those representing soil nutritional conditions were  
382 considered to be the consequence of landform development (44, 54), especially in  
383 Group 1. In our study, the environmental factors had strong influences on bacterial  
384 and archaeal community structures. Nonetheless, these were likely to play  
385 subsequently important roles in the distribution of microbial communities,  
386 predominantly driven by landforms and soil element compositions.

387

388 In conclusion, this study provides evidence for the influence of geological evolution  
389 on the small-scale distribution of microbial communities. As a result, microbial

390 community structure is proposed as an indicator of the two different landforms in  
391 the Fildes region, King George Island. In addition, other locations in Antarctica  
392 experience the same type of glacial activity and isostatic uplift as the coastal ice-free  
393 areas around King George Island, maritime Antarctica, and Prince Charles Mountains  
394 area, East Antarctica (64), implying that microbial communities may also be diverse  
395 and influenced by different geological evolution events at small to moderate spatial  
396 scales in these areas. Continued research already, in progress, will verify whether  
397 microbial communities can be used as indicators of different landforms in other,  
398 similar geological areas in maritime Antarctica. This will contribute to finding  
399 different microbial communities in limited spatial regions based on geological  
400 research, and will examine different types of geological heterogeneity according to  
401 microbial communities.

402

## 403 **Materials and Methods**

### 404 *Quadrat plot description, soil sampling, and sample preparation*

405 The Fildes region is the largest ice-free area on King George Island, with a humid and  
406 relatively mild sub-Antarctic maritime climate. The mean annual temperature and  
407 precipitation are  $-2.4^{\circ}\text{C}$  and over 500 mm, respectively (26). The 12 permanent  
408 quadrat plots (1.5 m  $\times$  1.0 m each) investigated in this study had been established on  
409 Fildes Peninsula and Ardley Island between 2013 and 2015. For plot characteristics,  
410 please see the Introduction for details. Each quadrat plot was fenced to minimize  
411 disturbance. GPS coordinates, vegetation characteristics, and the landscape of

412 quadrat locations are shown in Table 2 and Fig. S7. The distance between quadrat  
413 plots ranges from approximately 1.6 to 8.2 km. Sampling occurred during China's  
414 33rd Antarctic expedition in January 2017. Soils were sampled from the A-horizon (10  
415 cm), at an internal distance of approximately 3–5 m, in triplicate around each  
416 quadrat plot. Soil samples collected for each replicate were taken from five soil cores  
417 (5 cm diameter) and mixed thoroughly. A total of 36 soil samples were placed in  
418 sterile plastic bags, and soil DNA was extracted within 2 h in the laboratory of the  
419 Great Wall Station. The remaining soils were stored in the freezer until further soil  
420 physic-chemical property analysis.

421

#### 422 *DNA extraction, PCR, pyrosequencing, and pyrosequencing data treatment*

423 Genomic DNA was extracted using a PowerSoil DNA Isolation Kit (MoBio, Carlsbad,  
424 CA, USA) according to the manufacturer's instructions. Duplicate DNA extraction was  
425 performed for each sampling plot, and all duplicated DNA products were pooled to  
426 reduce potential DNA extraction bias. Afterwards, DNA concentration was measured  
427 by UV spectrophotometer (Eppendorf, Bio Photometer), and its molecular size was  
428 estimated by 0.8% agarose gel electrophoresis. Details of pyrosequencing and  
429 pyrosequencing data treatment are described in Appendix S1. These sequence data  
430 have been submitted to the DDBJ/EMBL/GenBank databases (SRA) under accession  
431 no. SRP132288, accession no.SRP132345 and accession no.SRP132350.

432

#### 433 *PLFA analysis*

434 Phospholipid fatty acids (PLFAs) from soil samples were extracted, fractionated,  
435 quantified, and analysed using the protocol described by (6). In brief, 2.0 g of soil (dry  
436 weight) was extracted with a chloroform-methanol-citrate buffer mixture (1:2:0.8)  
437 and fractionated into neutral lipids, glycolipids, and phospholipids on a silicic acid  
438 column (Agilent Technologies, Sillic Box, CA, USA). Phospholipids were subjected to  
439 mild alkaline methanolysis, after separating out fatty acid methyl esters on an Agilent  
440 6890N gas chromatograph equipped with a flame ionization detector and an HP-1  
441 Ultra 2 capillary column (Agilent Technologies, Santa Clara, CA, USA). Peak areas were  
442 quantified by adding methyl non-adeconoate fatty acid (C19:0) (Sigma) as an internal  
443 standard. The fatty acid methyl esters were prepared according to the MIDI protocol  
444 and analysed using the MIDI Sherlock Microbial Identification System (MIDI, Newark,  
445 DE). The fatty acids *i*14:0, *i*15:0, *a*15:0, *i*16:0, *a*16:0, *i*17:0, and *a*17:0 represented  
446 gram-positive bacteria, 16:1 $\omega$ 9 $c$ , *cy*17:0, 18:1 $\omega$ 5 $c$ , 18:1 $\omega$ 7 $c$ , and *cy*19:0 represented  
447 gram-negative bacteria, 10Me16:0 (24), 10Me17:0, and 10Me18:0 represented  
448 Actinomycetea (73), branched monoenoic and mid-branched saturated fatty acid  
449 PLFAs represented anaerobic microorganisms (76), and 16:1 $\omega$ 5 represented AM fungi  
450 (46). PLFAs were categorized and calculated in the MIDI Sherlock Microbial  
451 Identification System (MIDI, Newark, DE).

452

#### 453 *Soil element composition determined by X-ray fluorescence spectrometer*

454 Soil samples were dried at 105°C for 6 h and then ground into powder. The soil  
455 powder was pressed in a 45 mm bore steel die under an approximately 20 t hydraulic

456 press. Every soil sample formed a stable soil pie of 45 mm diameter and 10 mm  
457 height. These pies were generally analysed within a few hours. The elements within  
458 soil samples were determined by X-ray fluorescence spectrometry (Bruker AXS,  
459 Germany) using a standardless quantitative analysis method (29). We removed poor  
460 quality elemental signals that rarely appeared (< 0.01%), generally in only one or two  
461 samples.

462

#### 463 *Soil parameters and vegetation attribute measurements*

464 Soil temperature was measured by a plug-type thermometer (ZD Instrument, China)  
465 at depths of 15 cm during soil sampling. Soil pH was measured by adding 10 ml of  
466 distilled water to 5 g of soil, and recording pH by a pH electrode (Mettler-Toledo,  
467 Switzerland). Soil moisture was determined as the gravimetric weight loss after  
468 drying the soil at 105°C until reaching a constant weight. Analysis of total organic  
469 carbon was performed using a TOC analyser (vario TOC, Elementar, Germany). To  
470 measure  $NH_4^+$  and  $NO_3^-$ , 10 g of soil was suspended in 50 ml of 2 mol/L KCl  
471 solution and shaken at 25°C for 1 h. Then, the soil solution mixture was centrifuged  
472 for 5 min in 3000 g. Subsequently, clear supernatant was passed through a filter of  
473 0.45 µm (Millipore, type GP), and analysed using a continuous flowing analyser  
474 (FIAsstar 5000, Foss, Denmark). Each quadrat of 1 × 1 m was selected to measure  
475 vegetation attributes including moss species number (MS), lichen species number  
476 (LS), hairgrass (*Deschampsia antarctica*) coverage (DAC), and total vegetation  
477 coverage (VC) according to previous protocols (68).

478

479 *Data statistical analyses*

480 For estimating bacterial, archaeal, and fungal diversity, Operational Taxonomic Unit  
481 (OTU) analysis including the Shannon, Chao1, and ACE indices was performed using  
482 the Mothur v. 1.30.2 software package (50). The relationships between soil  
483 elemental compositions and environmental attributes in the 32 soil samples were  
484 analysed by principal component analysis and hierarchical clustering heatmap  
485 analysis using the R v. 3.3.1 statistical software. The Wilcoxon test was performed for  
486 the soil elements and environments to determine the level of significance with a  
487 two-sided hypothesis using the Statistical Package for the Social Sciences software  
488 (SPSS). Significant differences in soil elemental compositions, environmental  
489 attributes, and microbial community structures between groups were determined by  
490 permutational multivariate analysis of variance (PERMANOVA) on 999 permutations  
491 of residuals under a reduced model using the R v. 3.3.1 statistical software. The  
492 Bray-Curtis distance was used to obtain dissimilarity matrices in the PERMANOVA  
493 test for microbial OTU data. The similarity test, Mantel test, and Canonical  
494 correspondence analysis (CCA) were used to evaluate the linkages between microbial  
495 community structures (general levels) and soil elemental compositions and  
496 environmental attributes with the Vegan package (v. 2.4-1) in R v. 3.3.1 according to  
497 the method described by Yang et al (67). Variation inflation factors were used to  
498 select factors in CCA modelling, of which the variance of canonical coefficients was  
499 not inflated by the presence of correlations with other factors, so that soil elements

500 and environmental attributes were removed if the variation inflation factor was  
501 larger than 20. Variation partitioning analysis resulted in 11 soil elements (Si, Ca, Zn,  
502 Fe, Al, Mn, V, Ti, Sr, P, Br) and 10 environmental attributes. The effect of factors on  
503 microbial community structures and the PLFA profile was estimated by a Monte Carlo  
504 permutation test (999 permutation). Differences in microbial categories marked by  
505 PLFA was determined using Welch's t-test (two-sided) using the STAMP software (v.  
506 2.1.3) package.

507

## 508 **Acknowledgements**

509 This work was supported by the R & D Infrastructure and Facility Development  
510 Program of the Ministry of Science and Technology of the People's Republic of China  
511 (Grant No. NIMR-2017-8), the National Natural Science Foundation of China (Grant  
512 No. 31270538), and the Chinese Polar Scientific Strategy Research Fund IC201706.  
513 We also thank Roberto Michel for sharing his knowledge of the geological  
514 environment of the Fildes region.



515 **References:**

- 516 1. Ayton, J., J. Aislabie, G. M. Barker, D. Saul, and S. Turner. 2010. Crenarchaeota  
517 affiliated with group 1.1b are prevalent in coastal mineral soils of the Ross Sea region  
518 of Antarctica. *Environ Microbiol* 12:689-703.
- 519 2. Banning, N. C., D. B. Gleeson, A. H. Grigg, C. D. Grant, G. L. Andersen, E. L. Brodie,  
520 and D. V. Murphy. 2011. Soil Microbial Community Successional Patterns during  
521 Forest Ecosystem Restoration. *Appl Environ Microb* 77:6158-6164.
- 522 3. Baroni, C., and G. Orombelli. 1994. Abandoned penguin rookeries as holocene  
523 paleoclimatic indicators in antarctica. *Geology* 22:23-26.
- 524 4. Battaglia, S., L. Leoni, and F. Sartori. 2003. Mineralogical and grain size  
525 composition of clays developing calanchi and biancane erosional landforms.  
526 *Geomorphology* 49:153-170.
- 527 5. Boelter, M. 2011. Soil development and soil biology on King George Island,  
528 Maritime Antarctic. *Pol Polar Res* 32:105-116.
- 529 6. Bossio, D. A., and K. M. Scow. 1995. Impact of carbon and flooding on the  
530 metabolic diversity of microbial communities in soils. *Appl Environ Microb*  
531 61:4043-4050.
- 532 7. Bowman, J. P. 2006. The Marine Clade of the Family Flavobacteriaceae: The  
533 Genera *Aequorivita*, *Arenibacter*, *Cellulophaga*, *Croceibacter*, *Formosa*, *Gelidibacter*,  
534 *Gillisia*, *Maribacter*, *Mesonina*, *Muricauda*, *Polaribacter*, *Psychroflexus*,  
535 *Psychroserpens*, *Robiginitalea*, *Salegentibacter*, *Tenacibaculum*, *Ulvibacter*,  
536 *Vitellibacter* and *Zobellia*, p. 677-694. *In* M. Dworkin, S. Falkow, E. Rosenberg, K.

- 537 Schleifer, and E. Stackebrandt (ed.), *The Prokaryotes: Volume 7: Proteobacteria:*  
538 *Delta, Epsilon Subclass.* Springer New York, New York, NY.
- 539 8. Braun, C., O. Mustafa, A. Nordt, S. Pfeiffer, and H. Peter. 2012. Environmental  
540 monitoring and management proposals for the Fildes Region, King George Island,  
541 Antarctica. *Polar Res* 31.
- 542 9. Breiman, L. 2001. Random forests. *Mach Learn* 45:5-32.
- 543 10. Castro, H. F., A. T. Classen, E. E. Austin, R. J. Norby, and C. W. Schadt. 2010. Soil  
544 Microbial Community Responses to Multiple Experimental Climate Change Drivers.  
545 *Appl Environ Microb* 76:999-1007.
- 546 11. Chong, C. W., D. A. Pearce, P. Convey, G. Y. A. Tan, R. C. S. Wong, and I. K. P. Tan.  
547 2010. High levels of spatial heterogeneity in the biodiversity of soil prokaryotes on  
548 Signy Island, Antarctica. *Soil Biol Biochem* 42:601-610.
- 549 12. Chong, C., D. A. Pearce, and P. Convey. 2015. Emerging spatial patterns in  
550 Antarctic prokaryotes. *Front Microbiol* 6.
- 551 13. Church, M. J., E. F. Delong, H. W. Ducklow, M. B. Karner, C. M. Preston, and D. M.  
552 Karl. 2003. Abundance and distribution of planktonic Archaea and Bacteria in the  
553 waters west of the Antarctic Peninsula. *Limnol Oceanogr* 48:1893-1902.
- 554 14. Convey, P. 1996. The influence of environmental characteristics on life history  
555 attributes of Antarctic terrestrial biota. *Biological reviews of the cambridge*  
556 *philosophical society* 71:191-225.
- 557 15. Crits-Christoph, A., C. K. Robinson, T. Barnum, W. F. Fricke, A. F. Davila, B.  
558 Jedynek, C. P. McKay, and J. Diruggiero. 2013. Colonization patterns of soil microbial

- 559 communities in the Atacama Desert. *Microbiome* 1.
- 560 16. Cutler, D. R., Jr. T. C. Edwards, K. H. Beard, A. Cutler, and K. T. Hess. 2007.
- 561 Random forests for classification in ecology. *Ecology* 88:2783-2792.
- 562 17. Debruyne, J. M., L. T. Nixon, M. N. Fawaz, A. M. Johnson, and M. Radosevich.
- 563 2011. Global Biogeography and Quantitative Seasonal Dynamics of
- 564 Gemmatimonadetes in Soil. *Appl Environ Microb* 77:6295-6300.
- 565 18. Delong, E. F., K. Y. Wu, B. B. Prezelin, and R. Jovine. 1994. High abundance of
- 566 archaea in antarctic marine picoplankton. *Nature* 371:695-697.
- 567 19. Dumbrell, A. J., M. Nelson, T. Helgason, C. Dytham, and A. H. Fitter. 2010.
- 568 Relative roles of niche and neutral processes in structuring a soil microbial
- 569 community. *Isme J* 4:337-345.
- 570 20. Evans, I. S. 2012. Geomorphometry and landform mapping: What is a landform?
- 571 *Geomorphology* 137:94-106.
- 572 21. Fabiszewski, J., and B. Wojtun. 1993. The maritime Antarctic coastal ecosystem
- 573 of Admiralty Bay.
- 574 22. Falush, D., T. Wirth, B. Linz, J. K. Pritchard, M. Stephens, M. Kidd, M. J. Blaser, D.
- 575 Y. Graham, S. Vacher, G. I. Perez-Perez, Y. Yamaoka, F. Megraud, K. Otto, U. Reichard,
- 576 E. Katzwitsch, X. Y. Wang, M. Achtman, and S. Suerbaum. 2003. Traces of human
- 577 migrations in *Helicobacter pylori* populations. *Science* 299:1582-1585.
- 578 23. Fierer, N., and R. B. Jackson. 2006. The diversity and biogeography of soil
- 579 bacterial communities. *P Natl Acad Sci Usa* 103:626-631.
- 580 24. Frostegard, A., and E. Baath. 1996. The use of phospholipid fatty acid analysis to

- 581 estimate bacterial and fungal biomass in soil. *Biol Fert Soils* 22:59-65.
- 582 25. Ge, Y., J. He, Y. Zhu, J. Zhang, Z. Xu, L. Zhang, and Y. Zheng. 2008. Differences in  
583 soil bacterial diversity: driven by contemporary disturbances or historical  
584 contingencies? *Isme J* 2:254-264.
- 585 26. Gerighausen, U., K. Brautigam, O. Mustafa, and H. U. Peter. 2003. Expansion of  
586 vascular plants on an Antarctic island a consequence of climate change? p. 79-83. *In*  
587 A. Huiskes, W. Gieskes, J. Rozema, R. Schorno, S. M. VanDerVies, and W. J. Wolff  
588 (ed.).
- 589 27. Goncalves, V. N., C. L. Cantrell, D. E. Wedge, M. C. Ferreira, M. A. Soares, M. R.  
590 Jacob, F. S. Oliveira, D. Galante, F. Rodrigues, T. M. A. Alves, C. L. Zani, P. A. S. Junior,  
591 S. Murta, A. J. Romanha, E. C. Barbosa, E. G. Kroon, J. G. Oliveira, B. Gomez-Silva, A.  
592 Galetovic, C. A. Rosa, and L. H. Rosa. 2016. Fungi associated with rocks of the  
593 Atacama Desert: taxonomy, distribution, diversity, ecology and bioprospection for  
594 bioactive compounds. *Environ Microbiol* 18:232-245.
- 595 28. Guilizzoni, P., A. Marchetto, A. Lami, A. Brauer, L. Vigliotti, S. Musazzi, L. Langone,  
596 M. Manca, F. Lucchini, N. Calanchi, E. Dinelli, and A. Mordenti. 2006. Records of  
597 environmental and climatic changes during the late Holocene from Svalbard:  
598 palaeolimnology of Kongressvatnet. *J Paleolimnol* 36:325-351.
- 599 29. Handley, K. M., C. Boothman, R. A. Mills, R. D. Pancost, and J. R. Lloyd. 2010.  
600 Functional diversity of bacteria in a ferruginous hydrothermal sediment. *Isme J*  
601 4:1193-1205.
- 602 30. Ingolfsson, O., C. Hjort, P. A. Berkman, S. Bjorck, E. Colhoun, I. D. Goodwin, B.

- 603 Hall, K. Hirakawa, M. Melles, P. Moller, and M. L. Prentice. 1998. Antarctic glacial  
604 history since the Last Glacial Maximum: an overview of the record on land. *Antarct*  
605 *Sci* 10:326-344.
- 606 31. Kalanetra, K. M., N. Bano, and J. T. Hollibaugh. 2009. Ammonia-oxidizing  
607 Archaea in the Arctic Ocean and Antarctic coastal waters. *Environ Microbiol*  
608 11:2434-2445.
- 609 32. Karr, E. A., J. M. Ng, S. M. Belchik, W. M. Sattley, M. T. Madigan, and L. A.  
610 Achenbach. 2006. Biodiversity of methanogenic and other Archaea in the  
611 permanently frozen Lake Fryxell, Antarctica. *Appl Environ Microb* 72:1663-1666.
- 612 33. Kuang, J., L. Huang, L. Chen, Z. Hua, S. Li, M. Hu, J. Li, and W. Shu. 2013.  
613 Contemporary environmental variation determines microbial diversity patterns in  
614 acid mine drainage. *Isme J* 7:1038-1050.
- 615 34. Lark, R. M. 1999. Soil-landform relationships at within-field scales: an  
616 investigation using continuous classification. *Geoderma* 92:141-165.
- 617 35. Lauber, C. L., M. Hamady, R. Knight, and N. Fierer. 2009. Pyrosequencing-Based  
618 Assessment of Soil pH as a Predictor of Soil Bacterial Community Structure at the  
619 Continental Scale. *Appl Environ Microb* 75:5111-5120.
- 620 36. Lee, J. S., H. K. Lee, J. Hur, M. Andreev, and S. G. Hong. 2008. Diversity of the  
621 lichenized fungi in King George Island, Antarctica, revealed by phylogenetic analysis  
622 of partial large subunit rDNA sequences. *J Microbiol Biotechn* 18:1016-1023.
- 623 37. Lin, W., Y. Wang, B. Li, and Y. Pan. 2012. A biogeographic distribution of  
624 magnetotactic bacteria influenced by salinity. *Isme J* 6:475-479.

- 625 38. Liu, X., and X. Zheng. 1988. Geology of volcanic rocks on Fildes Peninsula, King  
626 George Island, West Antarctica. *Chinese Journal of Polar Research* 1988-01.
- 627 39. Lozupone, C. A., and R. Knight. 2007. Global patterns in bacterial diversity. *P Natl*  
628 *Acad Sci Usa* 104:11436-11440.
- 629 40. Ludwig, W., J. Euzéby, and W. B. Whitman. 2010. Road map of the phyla  
630 Bacteroidetes, Spirochaetes, Tenericutes (Mollicutes), Acidobacteria, Fibrobacteres,  
631 Fusobacteria, Dictyoglomi, Gemmatimonadetes, Lentisphaerae, Verrucomicrobia,  
632 Chlamydiae, and Planctomycetes, p. 1-19. *In* N. R. Krieg, J. T. Staley, D. R. Brown, B. P.  
633 Hedlund, B. J. Paster, N. L. Ward, W. Ludwig, and W. B. Whitman (ed.), *Bergey's*  
634 *Manual® of Systematic Bacteriology: Volume Four The Bacteroidetes, Spirochaetes,*  
635 *Tenericutes (Mollicutes), Acidobacteria, Fibrobacteres, Fusobacteria, Dictyoglomi,*  
636 *Gemmatimonadetes, Lentisphaerae, Verrucomicrobia, Chlamydiae, and*  
637 *Planctomycetes.* Springer New York, New York, NY.
- 638 41. Mapelli, F., R. Marasco, A. Rizzi, F. Baldi, S. Ventura, D. Daffonchio, and S. Borin.  
639 2011. Bacterial Communities Involved in Soil Formation and Plant Establishment  
640 Triggered by Pyrite Bioweathering on Arctic Moraines. *Microb Ecol* 61:438-447.
- 641 42. Martiny, J., B. Bohannan, J. H. Brown, R. K. Colwell, J. A. Fuhrman, J. L. Green, M.  
642 C. Horner-Devine, M. Kane, J. A. Krumins, C. R. Kuske, P. J. Morin, S. Naeem, L.  
643 Ovreas, A. L. Reysenbach, V. H. Smith, and J. T. Staley. 2006. Microbial biogeography:  
644 putting microorganisms on the map. *Nat Rev Microbiol* 4:102-112.
- 645 43. Meola, M., A. Lazzaro, and J. Zeyer. 2014. Diversity, resistance and resilience of  
646 the bacterial communities at two alpine glacier forefields after a reciprocal soil

- 647 transplantation. *Environ Microbiol* 16:1918-1934.
- 648 44. Michel, R. F. M., C. E. G. R. Schaefer, J. Lopez-Martinez, F. N. B. Simas, N. W.  
649 Haus, E. Serrano, and J. G. Bockheim. 2014. Soils and landforms from Fildes  
650 Peninsula and Ardley Island, Maritime Antarctica. *Geomorphology* 225:76-86.
- 651 45. Murray, A. E., C. M. Preston, R. Massana, L. T. Taylor, A. Blakis, K. Wu, and E. F.  
652 Delong. 1998. Seasonal and spatial variability of bacterial and archaeal assemblages  
653 in the coastal waters near Anvers Island, Antarctica. *Appl Environ Microb*  
654 64:2585-2595.
- 655 46. Olsson, P. A., I. Thingstrup, I. Jakobsen, and E. Baath. 1999. Estimation of the  
656 biomass of arbuscular mycorrhizal fungi in a linseed field. *Soil Biol Biochem*  
657 31:1879-1887.
- 658 47. Reith, F., J. Brugger, C. M. Zammit, A. L. Gregg, K. C. Goldfarb, G. L. Andersen, T.  
659 Z. Desantis, Y. M. Piceno, E. L. Brodie, Z. Lu, Z. He, J. Zhou, and S. A. Wakelin. 2012.  
660 Influence of geogenic factors on microbial communities in metallogenic Australian  
661 soils. *Isme J* 6:2107-2118.
- 662 48. Rousk, J., E. Baath, P. C. Brookes, C. L. Lauber, C. Lozupone, J. G. Caporaso, R.  
663 Knight, and N. Fierer. 2010. Soil bacterial and fungal communities across a pH  
664 gradient in an arable soil. *Isme J* 4:1340-1351.
- 665 49. Santos, I. R., D. I. T. Favaro, C. E. G. R. Schaefer, and E. V. Silva-Filho. 2007.  
666 Sediment geochemistry in coastal maritime Antarctica (Admiralty Bay, King George  
667 Island): Evidence from rare earths and other elements. *Mar Chem* 107:464-474.
- 668 50. Schloss, P. D., S. L. Westcott, T. Ryabin, J. R. Hall, M. Hartmann, E. B. Hollister, R.

- 669 A. Lesniewski, B. B. Oakley, D. H. Parks, C. J. Robinson, J. W. Sahl, B. Stres, G. G.  
670 Thallinger, D. J. Van Horn, and C. F. Weber. 2009. Introducing mothur: Open-Source,  
671 Platform-Independent, Community-Supported Software for Describing and  
672 Comparing Microbial Communities. *Appl Environ Microb* 75:7537-7541.
- 673 51. Spang, A., A. Poehlein, P. Offre, S. Zumbraegel, S. Haider, N. Rychlik, B. Nowka, C.  
674 Schmeisser, E. V. Lebedeva, T. Rattei, C. Boehm, M. Schmid, A. Galushko, R.  
675 Hatzenpichler, T. Weinmaier, R. Daniel, C. Schleper, E. Spieck, W. Streit, and M.  
676 Wagner. 2012. The genome of the ammonia-oxidizing Candidatus Nitrososphaera  
677 gargensis: insights into metabolic versatility and environmental adaptations. *Environ*  
678 *Microbiol* 14:3122-3145.
- 679 52. Summers, S., A. S. Whiteley, L. C. Kelly, and C. S. Cockell. 2013. Land coverage  
680 influences the bacterial community composition in the critical zone of a sub-Arctic  
681 basaltic environment. *Fems Microbiol Ecol* 86:381-393.
- 682 53. Swanson, C. A., and M. K. Sliwinski. 2013. Archaeal assemblages inhabiting  
683 temperate mixed forest soil fluctuate in taxon composition and spatial distribution  
684 over time. *Archaea (Vancouver, B.C.)* 2013:870825-870825.
- 685 54. Tatur, A., A. Myrcha, and J. Niegodysz. 1997. Formation of abandoned penguin  
686 rookery ecosystems in the maritime Antarctic. *Polar Biol* 17:405-417.
- 687 55. Teixeira, L. C. R. S., R. S. Peixoto, J. C. Cury, W. J. Sul, V. H. Pellizari, J. Tiedje, and  
688 A. S. Rosado. 2010. Bacterial diversity in rhizosphere soil from Antarctic vascular  
689 plants of Admiralty Bay, maritime Antarctica. *Isme J* 4:989-1001.
- 690 56. Teixeira, L. C. R. S., R. S. Peixoto, J. C. Cury, W. J. Sul, V. H. Pellizari, J. Tiedje, and



- 691 A. S. Rosado. 2010. Bacterial diversity in rhizosphere soil from Antarctic vascular  
692 plants of Admiralty Bay, maritime Antarctica. *Isme J* 4:989-1001.
- 693 57. Thomson, B. C., N. Ostle, N. Mcnamara, M. J. Bailey, A. S. Whiteley, and R. I.  
694 Griffiths. 2010. Vegetation Affects the Relative Abundances of Dominant Soil  
695 Bacterial Taxa and Soil Respiration Rates in an Upland Grassland Soil. *Microb Ecol*  
696 59:335-343.
- 697 58. Tosi, S., B. Casado, R. Gerdol, and G. Caretta. 2002. Fungi isolated from Antarctic  
698 mosses. *Polar Biol* 25:262-268.
- 699 59. Viles, H. A. 2012. Microbial geomorphology: A neglected link between life and  
700 landscape. *Geomorphology* 157:6-16.
- 701 60. Walsh, D. A., R. T. Papke, and W. F. Doolittle. 2005. Archaeal diversity along a  
702 soil salinity gradient prone to disturbance. *Environ Microbiol* 7:1655-1666.
- 703 61. Wang, N. F., T. Zhang, F. Zhang, E. T. Wang, J. F. He, H. Ding, B. T. Zhang, J. Liu, X.  
704 B. Ran, and J. Y. Zang. 2015. Diversity and structure of soil bacterial communities in  
705 the Fildes Region (maritime Antarctica) as revealed by 454 pyrosequencing. *Front*  
706 *Microbiol* 6.
- 707 62. Watcham, E. P., M. J. Bentley, D. A. Hodgson, S. J. Roberts, P. T. Fretwell, J. M.  
708 Lloyd, R. D. Larter, P. L. Whitehouse, M. J. Leng, P. Monien, and S. G. Moreton. 2011.  
709 A new Holocene relative sea level curve for the South Shetland Islands, Antarctica.  
710 *Quaternary Sci Rev* 30:3152-3170.
- 711 63. Webb, C. O., D. D. Ackerly, M. A. Mcpeek, and M. J. Donoghue. 2002.  
712 Phylogenies and community ecology. *Annual Review of Ecology and Systematics*

- 713 33:475-505.
- 714 64. Wellman, P., and R. J. Tingey. 1981. Glaciation, erosion and uplift over part of  
715 east antarctica. *Nature* 291:142-144.
- 716 65. Wynnwilliams, D. D. 1990. Ecological aspects of antarctic microbiology.  
717 *Advances in Microbial Ecology* 11:71-146.
- 718 66. Xie, X. J., and T. X. Ren. 1993. National Geochemical Mapping And Environmental  
719 Geochemistry - Progress In China. *J Geochem Explor* 49:15-34.
- 720 67. Yang, Y., Y. Gao, S. Wang, D. Xu, H. Yu, L. Wu, Q. Lin, Y. Hu, X. Li, Z. He, Y. Deng,  
721 and J. Zhou. 2014. The microbial gene diversity along an elevation gradient of the  
722 Tibetan grassland. *Isme J* 8:430-440.
- 723 68. Yao, Y., X. Wang, J. Li, J. Yang, S. Cao, F. Peng, L. Kurbatova, H. Peter, C. Braun,  
724 and C. Li. 2017. A network for long-term monitoring of vegetation in the area of  
725 Fildes Peninsula, King George Island. *Advances in Polar Science*:23-28.
- 726 69. Yergeau, E., K. K. Newsham, D. A. Pearce, and G. A. Kowalchuk. 2007. Patterns of  
727 bacterial diversity across a range of Antarctic terrestrial habitats. *Environ Microbiol*  
728 9:2670-82.
- 729 70. Yergeau, E., S. A. Schoondermark-Stolk, E. L. Brodie, S. Dejean, T. Z. Desantis, O.  
730 Goncalves, Y. M. Piceno, G. L. Andersen, and G. A. Kowalchuk. 2009. Environmental  
731 microarray analyses of Antarctic soil microbial communities. *Isme J* 3:340-351.
- 732 71. Yergeau, E., S. Bokhorst, A. H. L. Huiskes, H. T. S. Boschker, R. Aerts, and G. A.  
733 Kowalchuk. 2007. Size and structure of bacterial, fungal and nematode communities  
734 along an Antarctic environmental gradient. *Fems Microbiol Ecol* 59:436-451.

- 735 72. Young, I. M., J. W. Crawford, N. Nunan, W. Otten, and A. Spiers. 2008. Microbial  
736 distribution in soils: physics and scaling, p. 81-121. *In* D. L. Sparks (ed.), *Advances in*  
737 *Agronomy*, vol. 100.
- 738 73. Zelles, L. 1997. Phospholipid fatty acid profiles in selected members of soil  
739 microbial communities. *Chemosphere* 35:275-294.
- 740 74. Zhang, B., X. Wu, G. Zhang, S. Li, W. Zhang, X. Chen, L. Sun, B. Zhang, G. Liu, and  
741 T. Chen. 2016. The diversity and biogeography of the communities of Actinobacteria  
742 in the forelands of glaciers at a continental scale. *Environ Res Lett* 11.
- 743 75. Zhang, N., and M. Blackwell. 2002. Population structure of dogwood  
744 anthracnose fungus. *Phytopathology* 92:1276-1283.
- 745 76. Zhong, W., T. Gu, W. Wang, B. Zhang, X. Lin, Q. Huang, and W. Shen. 2010. The  
746 effects of mineral fertilizer and organic manure on soil microbial community and  
747 diversity. *Plant Soil* 326:511-522.

748

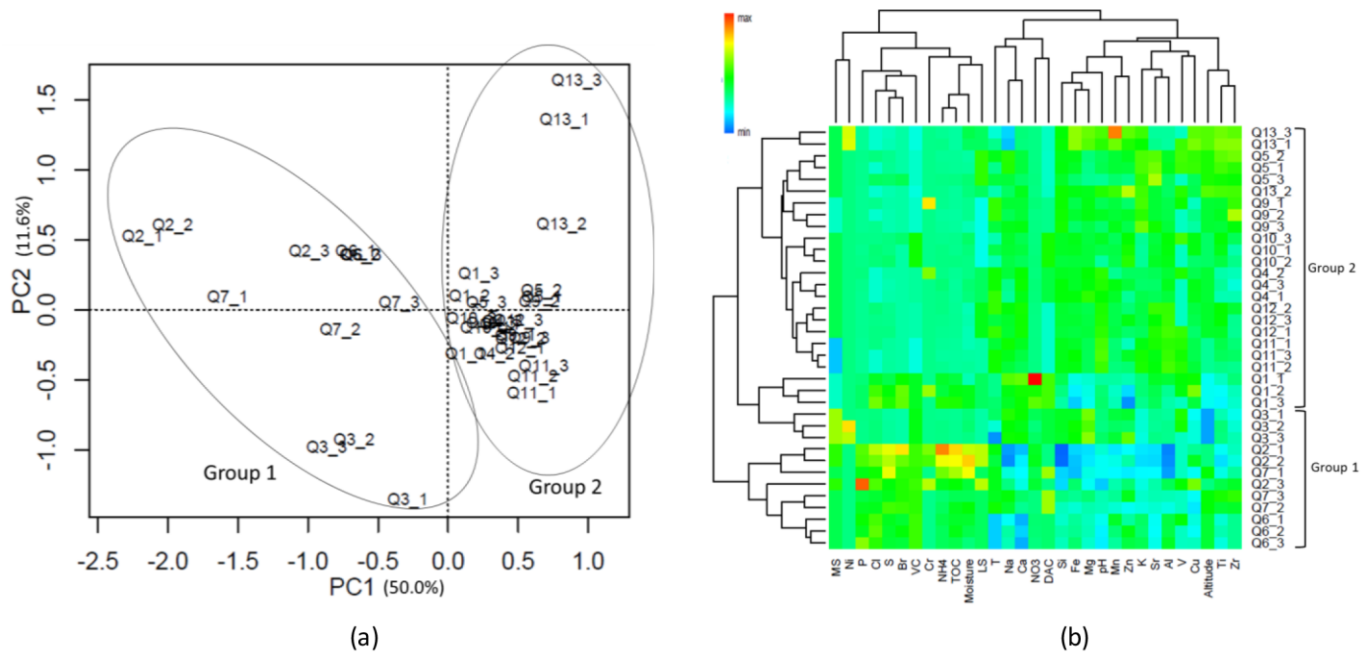

749

750 **Fig. 1** (a) Principle component analysis (PCA) and (b) heatmap cluster analysis of the normalized soil  
 751 elemental compositions and environmental attribute data. The values of PC1 and 2 are percentages of total  
 752 variations that can be attributed to the corresponding axis. Abbreviations: T, temperature; TOC, total  
 753 organic carbon; MS, moss species amount; LS, lichen species amount; DAC, hairgrass (*Deschampsia*  
 754 *antarctica*) coverage; and VC, total vegetation coverage.

755

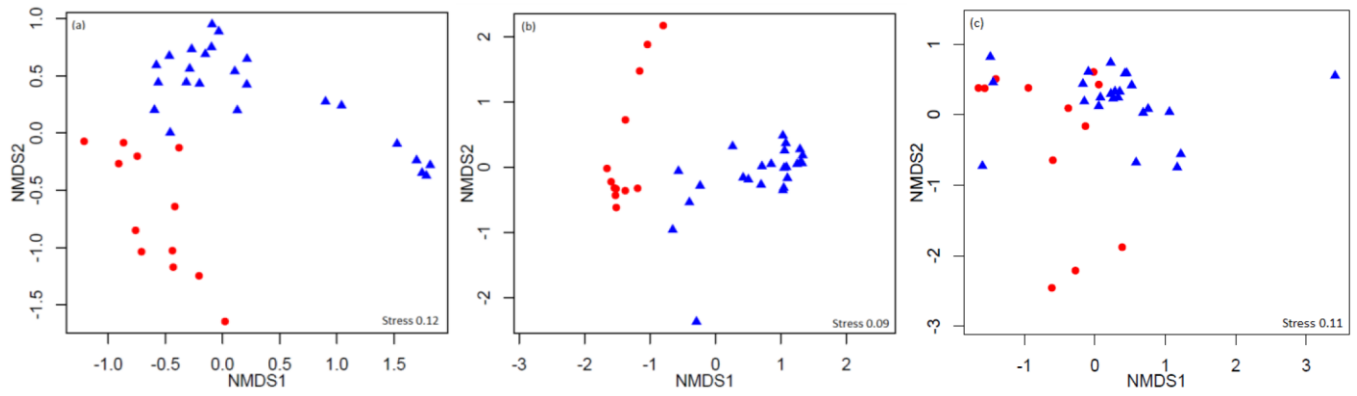

756

757 **Fig. 2** Nonmetric multidimensional scaling (NMDS) analysis of the (a) bacterial, (b) archaeal, and (c) fungal

758 Operational Taxonomic Unit (OTU) datasets. Circle = Group 1; triangle = Group 2.

759

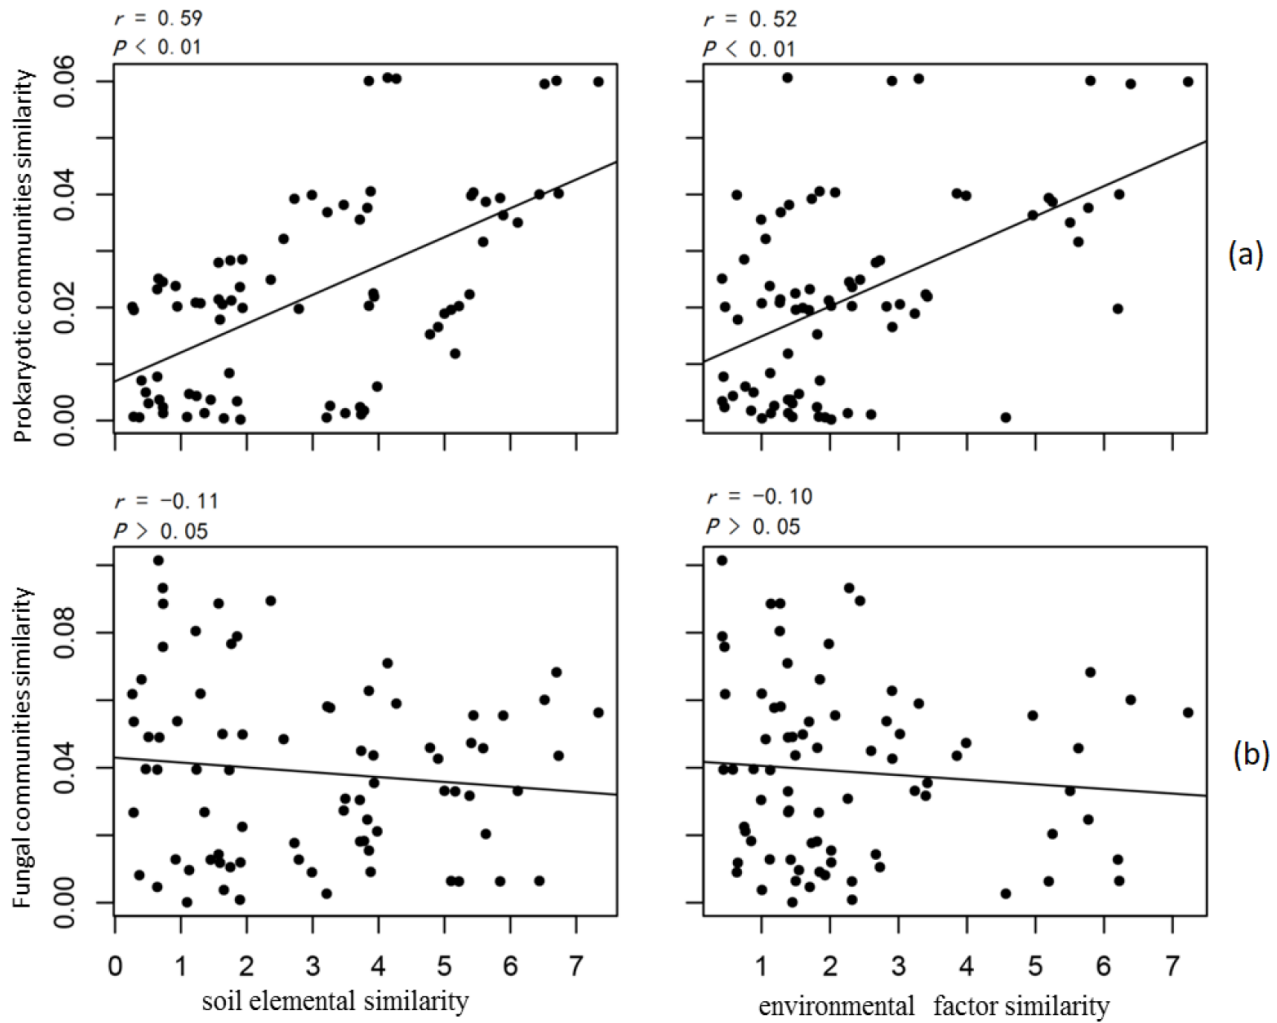

760

761

**Fig. 3** Pearson correlations between (a) the prokaryotic community and (b) the fungal community with soil elemental compositions and environmental attributes. Similarity values are directly indicated by calculated pairwise Euclid distances between samples.

762

763

764

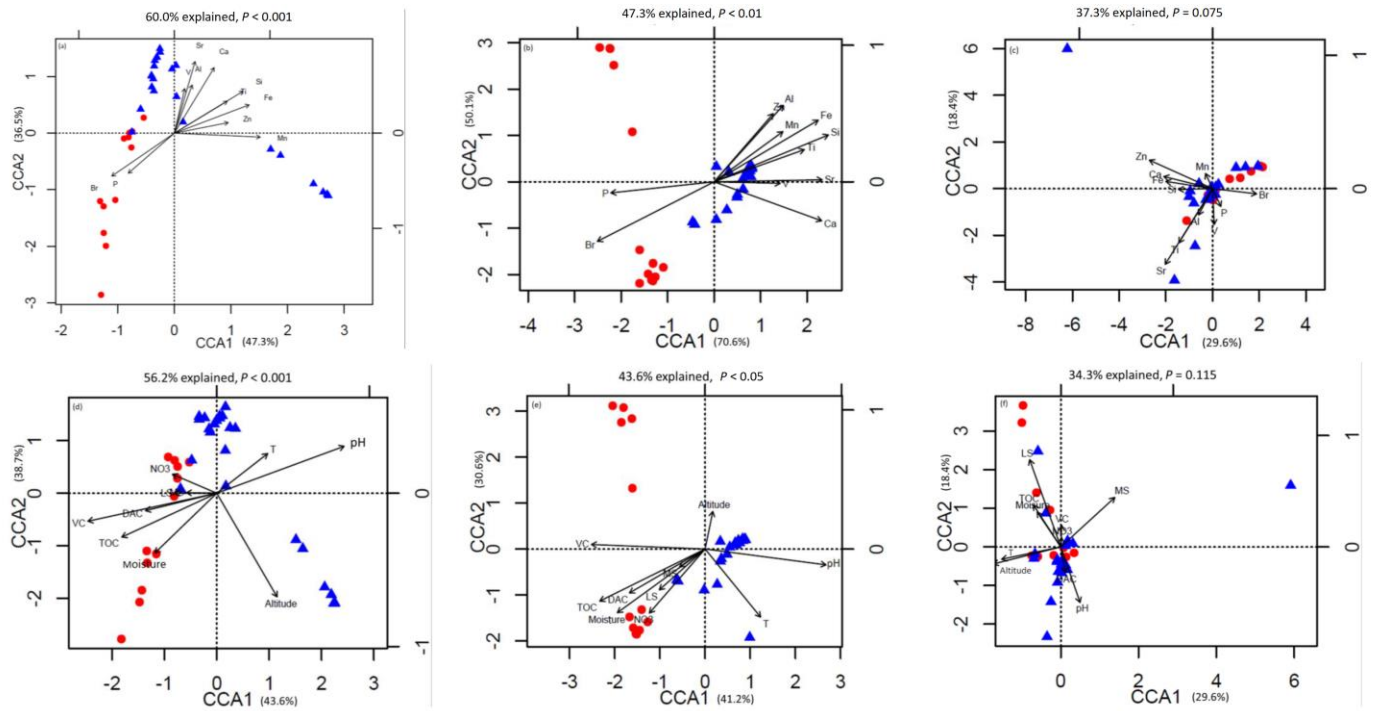

765

766 **Fig. 4** Canonical correspondence analysis (CCA) of (a) Bacterial Operational Taxonomic Unit (OTU) data and  
767 elemental compositions; (b) archaeal OTU data and elemental compositions; (c) fungal OTU data and  
768 elemental compositions; (d) bacterial OTU data and environmental attributes; (e) archaeal OTU data and  
769 environmental attributes; (f) fungal OTU data and environmental attributes.

770

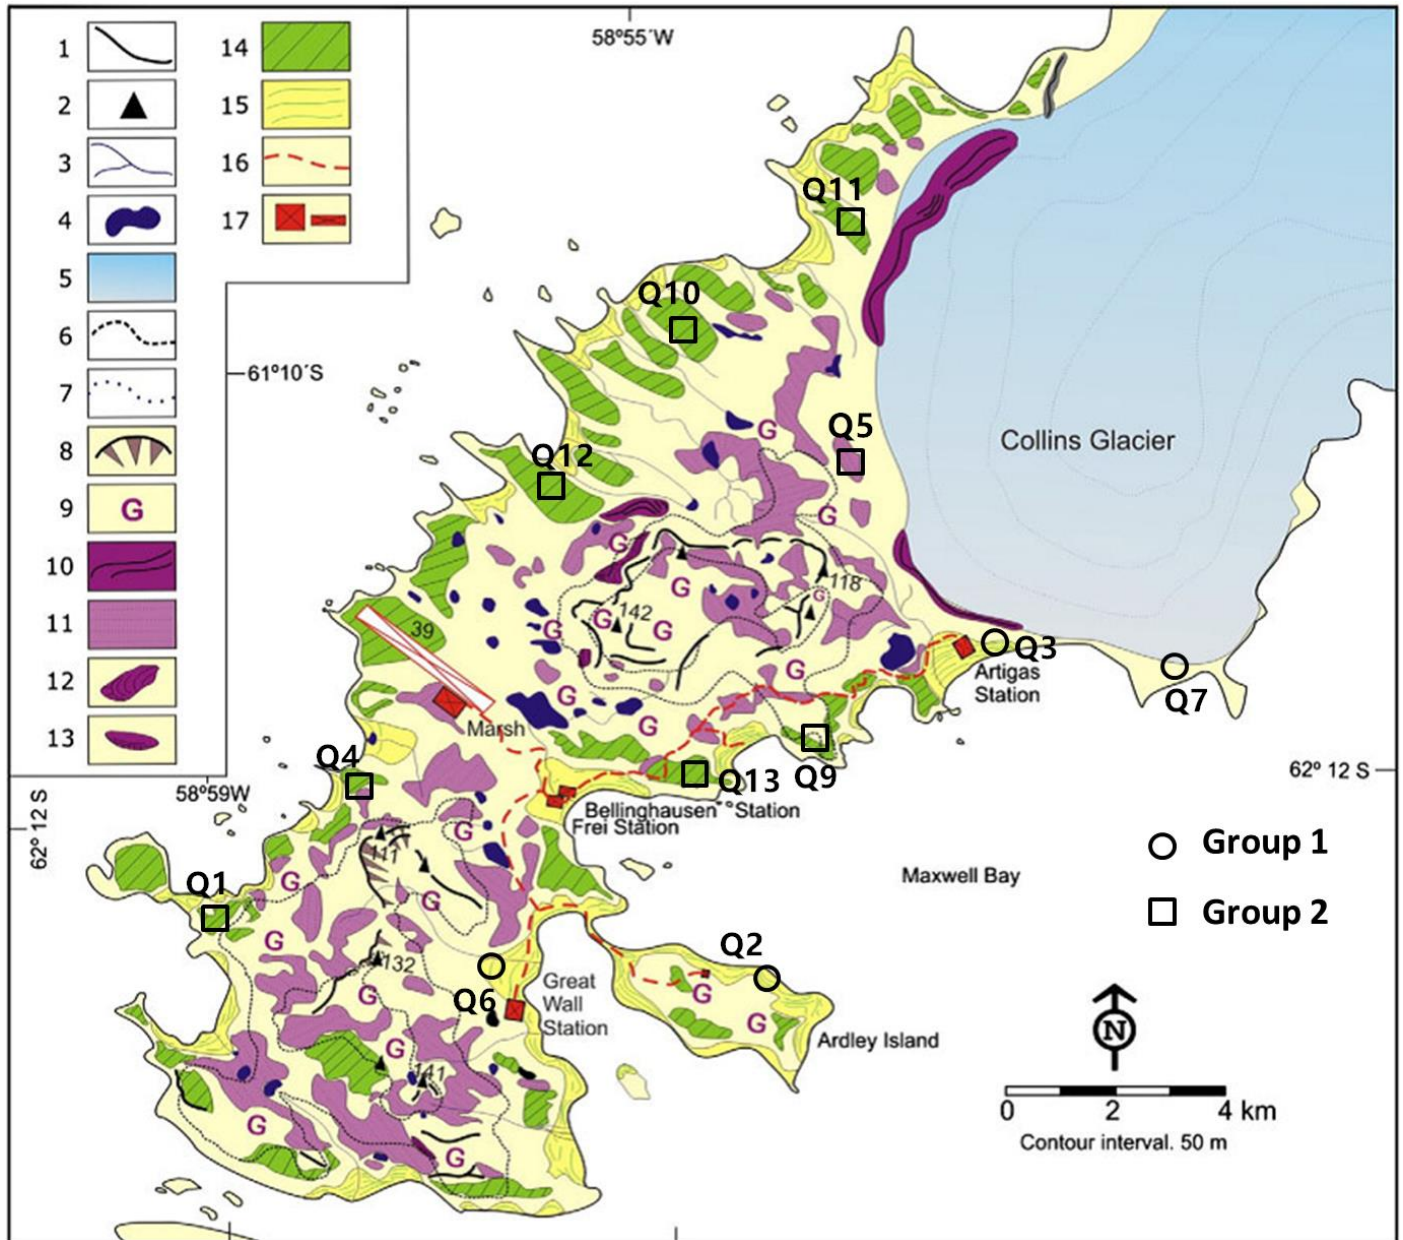

771  
772 **Fig. 5** Geomorphological map of the Fildes region, derived from Michel et al (44). Quadrats of Group 1 and  
773 Group 2 were located at Holocene raised beaches (No. 15) and marine platforms (periglacial landforms  
774 belonging to Tertiary volcanic stratigraphy, No. 14). The landform type of quadrat Q7 can be deemed as  
775 part of the Holocene raised beaches because it suffered recent glacio-isostatic uplift but was still covered  
776 by ice during that uplift (personal communication; Michel, 2018). Please refer to original literature for  
777 landforms marked by other numbers.



779

780

781

782

783

784

785

786

787

788

789

790

791

792

793

794

795

796

797

798

799

800

801

802

| Soil elements | Prokaryote |                 | Fungi  |                 | PLFA   |                 |
|---------------|------------|-----------------|--------|-----------------|--------|-----------------|
|               | r2         | <i>P</i> -value | r2     | <i>P</i> -value | r2     | <i>P</i> -value |
| Al            | 0.2547     | 0.002**         | 0.0014 | 0.979           | 0.4648 | 0.001***        |
| Ca            | 0.5647     | 0.001***        | 0.0012 | 0.981           | 0.3276 | 0.003**         |
| Mn            | 0.5235     | 0.001***        | 0.0018 | 0.965           | 0.3859 | 0.001***        |
| P             | 0.3372     | 0.005**         | 0.0488 | 0.378           | 0.2883 | 0.012*          |
| Si            | 0.5621     | 0.001***        | 0.0299 | 0.609           | 0.6624 | 0.001***        |
| Sr            | 0.5332     | 0.001***        | 0.2784 | 0.007*          | 0.4546 | 0.001***        |
| Ti            | 0.3316     | 0.003**         | 0.2702 | 0.010*          | 0.3503 | 0.001***        |
| V             | 0.2005     | 0.020*          | 0.0408 | 0.697           | 0.1828 | 0.041*          |
| Zn            | 0.2309     | 0.009**         | 0.1120 | 0.216           | 0.3289 | 0.003**         |
| Br            | 0.5059     | 0.001***        | 0.0369 | 0.558           | 0.6223 | 0.001***        |
| Fe            | 0.5210     | 0.001***        | 0.0165 | 0.761           | 0.6978 | 0.001***        |

  

| Environmental factors | Prokaryote |                 | Fungi  |                 | PLFA   |                 |
|-----------------------|------------|-----------------|--------|-----------------|--------|-----------------|
|                       | r2         | <i>P</i> -value | r2     | <i>P</i> -value | r2     | <i>P</i> -value |
| TOC                   | 0.4139     | 0.001***        | 0.1748 | 0.099           | 0.6776 | 0.001***        |
| NO3                   | 0.0667     | 0.286           | 0.0055 | 0.792           | 0.5661 | 0.120           |
| T                     | 0.1531     | 0.068           | 0.1867 | 0.055           | 0.1042 | 0.176           |
| pH                    | 0.6958     | 0.001***        | 0.2385 | 0.007**         | 0.4830 | 0.001***        |
| Moisture              | 0.2644     | 0.012*          | 0.1231 | 0.128           | 0.5844 | 0.001***        |
| Altitude              | 0.3003     | 0.002**         | 0.2463 | 0.024*          | 0.0065 | 0.912           |
| DAC                   | 0.2007     | 0.030*          | 0.0454 | 0.516           | 0.3487 | 0.003**         |
| MS                    | 0.0320     | 0.557           | 0.2723 | 0.007**         | 0.0505 | 0.430           |
| LS                    | 0.0624     | 0.325           | 0.5927 | 0.001***        | 0.1367 | 0.103           |
| VC                    | 0.6465     | 0.001***        | 0.0298 | 0.779           | 0.4422 | 0.001***        |

**Table 1** Monte Carlo test of the factors (soil elemental compositions and environmental attributes) and compositions of microbial communities and phospholipid fatty acids (PLFA). Significant differences ( $P < 0.05$ ) are indicated in bold. \*\*\* $P < 0.001$ , \*\* $P < 0.01$ , \* $P < 0.05$ . *P*-values based on 999 permutations.

803

804

| Quadrat<br>code | Coordinates                  | Elevation<br>(m.a.s.l) | Aspect* | Number of<br>grass tufts* | Grass<br>cover/%* | Moss<br>cover/%* | Lichen<br>cover/%* |
|-----------------|------------------------------|------------------------|---------|---------------------------|-------------------|------------------|--------------------|
| Q1              | 62°12'39"S<br>59°00'49"W     | 11                     | NW      | 26                        | 20.75             | 55               | 10                 |
| Q2              | 62°12'39.6"S<br>58°55'35.9"W | 34                     | N       | 30                        | 11                | 46               | 43                 |
| Q3              | 62°11'05.1"S<br>58°52'37.3"W | 22                     | NE      | >50                       | 37.50             | 56               | 6                  |
| Q4              | 62°12'00"S<br>58°59'40"W     | 42                     | NW      | 46                        | 20                | 15               | 7                  |
| Q5              | 62°10'13"S<br>58°55'26"W     | 50                     | NW      | 1                         | 1.75              | 35               | 5                  |
| Q6              | 62°13'00"S<br>58°57'52"W     | 42                     | NE      | 4                         | 14                | 40               | 45                 |
| Q7              | 62°11'00.4"S<br>58°51'28.6"W | 47                     | NE      | >100                      | 50                | 40               | 10                 |
| Q9              | 62°11'20"S<br>58°55'10"W     | 42                     | NW      | 24                        | 10                | 20               | 10                 |
| Q10             | 62°09'09.1"S<br>58°55'44.2"W | 37                     | NW      | 17                        | 31                | 60               | 1                  |
| Q11             | 62°09'57.4"S<br>58°57'59.4"W | 32                     | NW      | 2                         | 1.50              | -                | 20                 |
| Q12             | 62°10'33"S<br>58°58'16"W     | 43                     | NW      | 1                         | 1.50              | 10               | 30                 |
| Q13             | 62°11'45.6"S<br>58°56'21.1"W | 56                     | NE      | 1                         | 2.50              | 5                | 25                 |

805 \*Data from the previous study (Yao *et al.*, 2017)

806 **Table 2** Locations and partial vegetation properties of the 12 soil quadrats.

807
